# Supplementary material for: Chemical Compositions of Scutellaria baicalensis Georgi. (Huangqin) Extracts and Their Effects on ACE2 Binding of SARS-CoV-2 Spike Protein, ACE2 Activity, and Free Radicals
Source: MDPI journal article supplement (doi:10.3390/ijms25042045), 2024-02-07
Supplement: s1 [file s1]

**Table S1.** Chemical structures and relative ion intensity of compounds identified in Huangqin (*Scutellaria baicalensis* Georgi. root).

| ID  | Retention time   |                  | Formula                                         | Name                                                 | Structure | Relative ion intensity ( $\times 10^8$ ) |             | Ref. |
|-----|------------------|------------------|-------------------------------------------------|------------------------------------------------------|-----------|------------------------------------------|-------------|------|
|     | ESI <sup>+</sup> | ESI <sup>-</sup> |                                                 |                                                      |           | WE (+/-)                                 | EE (+/-)    |      |
| 1.  | 12.81            | 13.16            | C <sub>21</sub> H <sub>22</sub> O <sub>12</sub> | Taxifolin 7-O-glucoside                              |           | 0.190/0.470                              | nd/nd       | [44] |
| 2.  | 13.10            | nd               | C <sub>21</sub> H <sub>18</sub> O <sub>12</sub> | Kaempferol 3-O-glucuronide                           |           | 0.054/0.050                              | nd/nd       | [44] |
| 3.  | 16.00            | 15.75            | C <sub>21</sub> H <sub>20</sub> O <sub>12</sub> | Carthamidin 7-O-glucuronide                          |           | 0.874/0.449                              | 0.093/0.055 | [45] |
| 4.  | 16.43            | 16.23            | C <sub>15</sub> H <sub>12</sub> O <sub>7</sub>  | Isomer of Pentahydroxyflavanone                      |           | 7.574/9.298                              | 1.150/2.182 | [44] |
| 5.  | nd               | 18.13            | C <sub>15</sub> H <sub>12</sub> O <sub>7</sub>  | Isomer of Pentahydroxyflavanone                      |           | nd/0.630                                 | nd/0.173    |      |
| 6.  | 19.59            | 19.35            | C <sub>21</sub> H <sub>20</sub> O <sub>13</sub> | 5,6,7,3',4'-Pentahydroxy Flavanon 7-O-glucuronide    |           | 0.094/0.130                              | nd/nd       | [44] |
| 7.  | 20.29            | 20.47            | C <sub>22</sub> H <sub>22</sub> O <sub>12</sub> | 5,7,2'-Trihydroxy-6-methoxyflavanone 7-O-glucuronide |           | 0.256/0.098                              | 0.050/0.020 | [44] |
| 8.  | 20.34            | 20.46            | C <sub>15</sub> H <sub>10</sub> O <sub>7</sub>  | Viscidulin I                                         |           | 4.954/3.297                              | 0.628/0.445 | [46] |
| 9.  | 21.98            | 21.76            | C <sub>21</sub> H <sub>20</sub> O <sub>12</sub> | Isocarthamidin 7-O-glucuronide                       |           | 2.498/2.835                              | 0.040/0.045 | [45] |
| 10. | 22.09            | 21.94            | C <sub>16</sub> H <sub>14</sub> O <sub>6</sub>  | Isomer of trihydroxy-methoxyflavanone                |           | 3.364/0.808                              | 0.346/0.176 | [46] |
| 11. | 22.69            | 22.83            | C <sub>21</sub> H <sub>18</sub> O <sub>12</sub> | Scutellarin                                          |           | 8.815/3.250                              | 0.089/0.044 | [46] |
| 12. | 22.83            | 22.97            | C <sub>21</sub> H <sub>20</sub> O <sub>12</sub> | Eriodictyol 7-O-glucuronide                          |           | 1.260/1.031                              | 0.050/0.027 | [45] |

|     |       |       |                                                 |                                                       |                                                                                     |               |             |      |
|-----|-------|-------|-------------------------------------------------|-------------------------------------------------------|-------------------------------------------------------------------------------------|---------------|-------------|------|
| 13. | 22.89 | 23.06 | C <sub>26</sub> H <sub>28</sub> O <sub>13</sub> | Chrysin 6-C-arabinoside-8-C-glucoside                 | 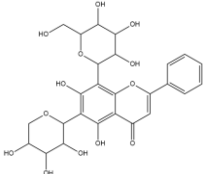   | 49.676/17.993 | 2.493/1.102 | [44] |
| 14. | 23.97 | 23.74 | C <sub>26</sub> H <sub>28</sub> O <sub>13</sub> | Chrysin 6-C-glucoside-8-C-arabinoside                 |    | 42.819/16.325 | 2.131/0.927 | [44] |
| 15. | 24.20 | 24.05 | C <sub>15</sub> H <sub>10</sub> O <sub>6</sub>  | 5,7,2',6'-Tetrahydroxyflavone                         |    | 4.249/1.506   | 1.028/0.665 | [44] |
| 16. | 24.29 | 24.12 | C <sub>15</sub> H <sub>10</sub> O <sub>7</sub>  | Isomer of Pentahydroxyflavone                         |    | 1.268/0.748   | 0.121/0.127 |      |
| 17. | 24.56 | 24.42 | C <sub>22</sub> H <sub>22</sub> O <sub>12</sub> | 5,7,2'-Trihydroxy-8-methoxy Flavanone 7-O-glucuronide |    | 0.312/0.526   | 0.009/nd    | [44] |
| 18. | 24.90 | 25.04 | C <sub>21</sub> H <sub>20</sub> O <sub>9</sub>  | Isomer of Chrysin 8-C-glucoside                       |    | 3.737/1.846   | 0.509/0.321 | [46] |
| 19. | 25.19 | 25.27 | C <sub>15</sub> H <sub>12</sub> O <sub>6</sub>  | Carthamidin                                           |  | 0.765/0.713   | 0.186/0.271 | [44] |
| 20. | 25.23 | 25.36 | C <sub>22</sub> H <sub>22</sub> O <sub>12</sub> | Isomer of trihydroxy-methoxyflavanone O-glucuronide   |  | 0.947/0.960   | 0.018/0.017 | [44] |
| 21. | 25.47 | 25.49 | C <sub>16</sub> H <sub>14</sub> O <sub>6</sub>  | Isomer of trihydroxy-methoxyflavanone                 |  | 2.676/1.745   | 0.465/0.412 | [46] |
| 22. | 25.95 | 25.76 | C <sub>22</sub> H <sub>20</sub> O <sub>12</sub> | 5,6,7-Trihydroxy-8-methoxy-7-O-glucuronide            |  | 16.485/2.228  | nd/nd       | [44] |
| 23. | 26.02 | 25.87 | C <sub>15</sub> H <sub>12</sub> O <sub>6</sub>  | Isocarthamidin                                        |  | 2.628/2.667   | 0.931/0.999 | [44] |
| 24. | 26.10 | 25.92 | C <sub>22</sub> H <sub>22</sub> O <sub>11</sub> | 5,7,2'-Trihydroxy-6-methoxyflavone 7-O-glucoside      |  | 0.723/0.221   | 0.038/0.016 | [44] |
| 25. | 26.29 | 26.11 | C <sub>17</sub> H <sub>14</sub> O <sub>8</sub>  | Viscidulin III                                        |  | 11.814/5.643  | 3.737/1.656 | [46] |
| 26. | 26.48 | 26.37 | C <sub>15</sub> H <sub>10</sub> O <sub>6</sub>  | Scutellarein                                          |  | 17.209/9.153  | 1.683/1.253 | [44] |

|     |       |       |                                                 |                                                     |                                                                                     |                    |             |      |
|-----|-------|-------|-------------------------------------------------|-----------------------------------------------------|-------------------------------------------------------------------------------------|--------------------|-------------|------|
| 27. | 26.88 | 26.97 | C <sub>21</sub> H <sub>18</sub> O <sub>11</sub> | Apigenin 7-O-glucuronide                            | 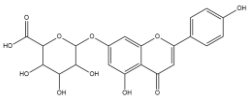   | 197.928/16.83<br>7 | 8.856/2.021 | [47] |
| 28. | 27.10 | 27.17 | C <sub>21</sub> H <sub>20</sub> O <sub>10</sub> | Apigenin 7-O-glucoside                              |    | 12.855/1.895       | 0.743/0.318 | [44] |
| 29. | 27.32 | 27.31 | C <sub>21</sub> H <sub>20</sub> O <sub>9</sub>  | Isomer of Chrysin 8-C-glucoside                     |    | 3.080/0.749        | 0.350/0.170 | [46] |
| 30. | 27.59 | 27.41 | C <sub>22</sub> H <sub>22</sub> O <sub>11</sub> | Isomer of trihydroxy methoxyflavone O-glucoside     |    | 2.198/0.285        | 0.139/0.027 |      |
| 31. | 27.72 | 27.57 | C <sub>21</sub> H <sub>20</sub> O <sub>11</sub> | Dihydrobaicalin                                     |    | 19.663/8.404       | 0.335/0.321 | [44] |
| 32. | 27.93 | 27.75 | C <sub>22</sub> H <sub>20</sub> O <sub>12</sub> | 5,7,8-Trihydroxy-6-methoxy Flavone-7-O-glucuronide  |    | 3.704/1.051        | nd/nd       | [44] |
| 33. | 28.14 | 27.98 | C <sub>22</sub> H <sub>22</sub> O <sub>12</sub> | Isomer of trihydroxy-methoxyflavanone O-glucuronide |   | 0.768/0.707        | 0.017/nd    |      |
| 34. | 28.22 | 28.09 | C <sub>21</sub> H <sub>18</sub> O <sub>11</sub> | Baicalin                                            |  | 42.845/13.435      | 0.879/0.454 | [47] |
| 35. | 28.51 | 28.57 | C <sub>21</sub> H <sub>20</sub> O <sub>9</sub>  | Chrysin 6-C-glucoside                               |  | 0.815/0.385        | 0.015/0.018 | [46] |
| 36. | 28.62 | 28.68 | C <sub>16</sub> H <sub>12</sub> O <sub>7</sub>  | Pedalitin                                           |  | 5.078/2.554        | 0.272/0.254 | [44] |
| 37. | 28.72 | 28.77 | C <sub>21</sub> H <sub>18</sub> O <sub>11</sub> | Norwogonin 7-O-glucuronide                          |  | 13.347/4.952       | 0.404/0.215 | [47] |
| 38. | 28.76 | 28.84 | C <sub>22</sub> H <sub>20</sub> O <sub>12</sub> | 5,7,2'-Trihydroxy-6-methoxy Flavone 7-O-glucuronide |  | 25.725/6.427       | 0.226/0.114 | [44] |
| 39. | 28.78 | 28.89 | C <sub>16</sub> H <sub>12</sub> O <sub>6</sub>  | 4'-Hydroxywogonin                                   |  | 12.063/1.048       | 0.359/0.148 | [48] |

|     |       |       |                                                 |                                                       |                                                                                     |               |             |      |
|-----|-------|-------|-------------------------------------------------|-------------------------------------------------------|-------------------------------------------------------------------------------------|---------------|-------------|------|
| 40. | 28.92 | 28.97 | C <sub>22</sub> H <sub>22</sub> O <sub>11</sub> | (2S)-5,7-Dihydroxy-6-methoxyflavanone 7-O-glucuronide | 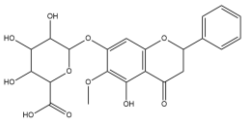   | 1.140/1.326   | 0.099/0.056 | [46] |
| 41. | 28.95 | 28.99 | C <sub>21</sub> H <sub>20</sub> O <sub>10</sub> | Baicalein 7-O-glucoside                               |    | 2.920/0.787   | 0.143/0.071 | [46] |
| 42. | 29.21 | 29.13 | C <sub>21</sub> H <sub>18</sub> O <sub>10</sub> | Chrysin 7-O-glucuronide                               |    | 25.746/6.500  | 0.687/0.325 | [44] |
| 43. | 29.25 | nd    | C <sub>18</sub> H <sub>16</sub> O <sub>8</sub>  | Isomer of trihydroxy-trimethoxyflavone                |    | 0.343/nd      | 0.030/0.011 |      |
| 44. | 29.40 | 29.23 | C <sub>22</sub> H <sub>20</sub> O <sub>11</sub> | Oroxylin A-7-O-glucuronide                            |    | 95.219/12.270 | 3.750/0.304 | [44] |
| 45. | 29.62 | 29.48 | C <sub>22</sub> H <sub>20</sub> O <sub>12</sub> | Isomer of Trihydroxy methoxy Flavone O-glucuronide    |   | 35.090/9.280  | 0.238/0.115 | [44] |
| 46. | 29.76 | 29.61 | C <sub>15</sub> H <sub>10</sub> O <sub>6</sub>  | Isoscutellarein                                       |  | 3.558/0.967   | 0.548/0.477 | [44] |
| 47. | 29.81 | 29.69 | C <sub>21</sub> H <sub>18</sub> O <sub>11</sub> | Baicalein 6-O-glucuronide                             |  | 19.076/6.575  | 0.057/0.032 | [44] |
| 48. | 29.91 | 29.81 | C <sub>17</sub> H <sub>14</sub> O <sub>7</sub>  | Isomer of trihydroxy dimethoxyflavone                 |  | 1.538/0.737   | 0.432/0.288 | [46] |
| 49. | 30.05 | nd    | C <sub>21</sub> H <sub>20</sub> O <sub>10</sub> | Isomer of dihydroxyflavanone O-glucoside              |  | 3.871/nd      | 0.147/nd    |      |
| 50. | 30.08 | 30.08 | C <sub>22</sub> H <sub>20</sub> O <sub>11</sub> | Wogonoside                                            |  | 85.548/23.270 | 5.004/0.424 | [44] |
| 51. | 30.40 | 30.44 | C <sub>17</sub> H <sub>14</sub> O <sub>8</sub>  | Isomer of Tetrahydroxy-dimethoxyflavone               |  | 1.213/0.621   | 0.158/0.148 |      |
| 52. | 30.72 | 30.68 | C <sub>23</sub> H <sub>22</sub> O <sub>12</sub> | 5,7-Dihydroxy-8,2'-dimethoxyflavone 7-O-glucuronide   |  | 20.360/6.678  | 0.339/0.130 | [46] |

|     |       |       |                                                |                                            |                                                                                     |                    |              |          |
|-----|-------|-------|------------------------------------------------|--------------------------------------------|-------------------------------------------------------------------------------------|--------------------|--------------|----------|
| 53. | 31.11 | 30.98 | C <sub>16</sub> H <sub>12</sub> O <sub>6</sub> | Hispidulin                                 | 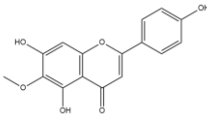   | 6.154/3.165        | 0.840/0.605  | [48]     |
| 54. | 31.32 | 31.20 | C <sub>18</sub> H <sub>16</sub> O <sub>8</sub> | 5,2',5'-Trihydroxy-6,7,8-trimethoxyflavone |    | 1.658/0.823        | 0.393/0.238  | [46]     |
| 55. | 31.57 | 31.53 | C <sub>17</sub> H <sub>14</sub> O <sub>7</sub> | Isomer of trihydroxy dimethoxyflavone      |    | 1.022/0.469        | 0.089/0.055  | [46]     |
| 56. | 31.61 | 31.60 | C <sub>16</sub> H <sub>12</sub> O <sub>6</sub> | Isomer of trihydroxy-methoxyflavone        |    | 8.049/4.741        | 0.993/0.749  |          |
| 57. | 31.84 | 31.85 | C <sub>15</sub> H <sub>10</sub> O <sub>5</sub> | Apigenin                                   |    | 12.389/6.284       | 1.943/1.852  | [44]     |
| 58. | 31.93 | 31.96 | C <sub>17</sub> H <sub>14</sub> O <sub>7</sub> | Viscidulin II                              |    | 0.587/0.224        | 0.085/0.031  | [46]     |
| 59. | 32.45 | 32.35 | C <sub>17</sub> H <sub>14</sub> O <sub>7</sub> | 5,7,6'-Trihydroxy-8,2'-dimethoxyflavone    |  | 4.462/2.022        | 1.410/0.648  | [46]     |
| 60. | 32.66 | 32.55 | C <sub>18</sub> H <sub>16</sub> O <sub>8</sub> | Isomer of trihydroxy-trimethoxyflavone     |  | 2.084/0.675        | 0.169/0.034  | [46]     |
| 61. | 32.70 | 32.59 | C <sub>16</sub> H <sub>12</sub> O <sub>6</sub> | Tenaxin II                                 |  | 18.049/6.862       | 1.716/0.594  | [46]     |
| 62. | 32.83 | 32.73 | C <sub>15</sub> H <sub>10</sub> O <sub>5</sub> | Baicalein                                  |  | 151.087/44.96<br>8 | 35.019/9.471 | [44]     |
| 63. | 32.83 | nd    | C <sub>15</sub> H <sub>10</sub> O <sub>6</sub> | Isomer of Tetrahydroxyflavone              |  | 2.057/nd           | 1.404/nd     | [44]     |
| 64. | 33.21 | 33.22 | C <sub>17</sub> H <sub>14</sub> O <sub>7</sub> | 5,8,2'-Trihydroxy-6,7-dimethoxyflavone     |  | 3.612/1.756        | 0.414/0.219  | [46]     |
| 65. | 33.44 | 33.46 | C <sub>16</sub> H <sub>12</sub> O <sub>6</sub> | 5,6,7-Trihydroxy-4'-methoxyflavone         |  | 5.534/2.928        | 1.398/0.791  | [44, 46] |

|     |       |       |                                                |                                         |                                                                                     |                    |              |      |
|-----|-------|-------|------------------------------------------------|-----------------------------------------|-------------------------------------------------------------------------------------|--------------------|--------------|------|
| 66. | 33.82 | 33.76 | C <sub>17</sub> H <sub>14</sub> O <sub>7</sub> | 5,7,2'-Trihydroxy-8,6'-dimethoxyflavone | 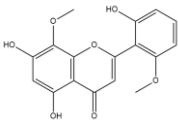   | 1.027/0.512        | 0.205/0.089  | [44] |
| 67. | 35.32 | 35.23 | C <sub>17</sub> H <sub>14</sub> O <sub>7</sub> | Isomer of trihydroxy dimethoxyflavone   |    | 0.787/0.645        | 0.182/0.163  | [46] |
| 68. | 36.43 | 36.41 | C <sub>18</sub> H <sub>16</sub> O <sub>8</sub> | Isomer of trihydroxy-trimethoxyflavone  |    | 0.680/0.566        | 0.146/0.108  |      |
| 69. | 36.90 | 36.81 | C <sub>18</sub> H <sub>16</sub> O <sub>7</sub> | Skullcapflavone                         |    | 5.657/1.753        | 2.193/0.285  | [44] |
| 70. | 37.09 | 37.03 | C <sub>16</sub> H <sub>12</sub> O <sub>5</sub> | Wogonin                                 |    | 107.452/26.96<br>4 | 26.908/1.698 | [44] |
| 71. | 37.18 | 37.12 | C <sub>15</sub> H <sub>10</sub> O <sub>4</sub> | Chrysin                                 |   | 9.151/6.996        | 2.767/1.531  | [44] |
| 72. | 37.78 | 37.73 | C <sub>17</sub> H <sub>14</sub> O <sub>6</sub> | 5,8-Dihydroxy-6,7-dimethoxyflavone      |  | 19.321/2.346       | 1.785/nd     | [44] |
| 73. | 38.09 | 38.02 | C <sub>19</sub> H <sub>18</sub> O <sub>8</sub> | Skullcapflavone II                      |  | 56.742/13.360      | 25.500/2.871 | [44] |
| 74. | 38.14 | 38.10 | C <sub>16</sub> H <sub>12</sub> O <sub>5</sub> | Oroxylin A                              |  | 47.933/6.529       | 13.894/0.181 | [44] |
| 75. | 38.26 | 38.22 | C <sub>17</sub> H <sub>14</sub> O <sub>6</sub> | 5,7-Dihydroxy-6,8-dimethoxyflavone      |  | 6.398/2.909        | 2.000/0.615  | [44] |
| 76. | 39.26 | 39.21 | C <sub>18</sub> H <sub>16</sub> O <sub>7</sub> | Tenaxin I                               |  | 5.772/2.654        | 1.649/0.578  | [44] |

ESI<sup>+</sup> represents in positive mode; ESI<sup>-</sup> represents in negative mode; WE: water extracts of Huangqin; EE: ethanol extracts of Huangqin; n/d represents not detectable.
